---

# A RANDOM FOREST MODEL FOR FORECASTING REGIONAL COVID-19 CASES UTILIZING REPRODUCTION NUMBER ESTIMATES AND DEMOGRAPHIC DATA

---

 **Joseph Galasso\***

Department of Biology  
#11, University of Dallas  
Irving, TX 75062  
jgalasso@udallas.edu

 **Duy M. Cao**

Department of Computer Science  
#134, University of Dallas  
Irving, TX 75062  
dcao@udallas.edu

 **Robert Hochberg**

Department of Computer Science  
#50, University of Dallas  
Irving, TX 75062  
hochberg@udallas.edu

*\*Corresponding Author*

## ABSTRACT

1 During the COVID-19 pandemic, predicting case spikes at the local level is important for a precise,  
2 targeted public health response and is generally done with compartmental models. The performance  
3 of compartmental models is highly dependent on the accuracy of their assumptions about disease  
4 dynamics within a population; thus, such models are susceptible to human error, unexpected events,  
5 or unknown characteristics of a novel infectious agent like COVID-19. We present a relatively  
6 non-parametric random forest model that forecasts the number of COVID-19 cases at the U.S.  
7 county level. Its most prioritized training features are derived from easily accessible, standard  
8 epidemiological data (i.e., regional test positivity rate) and the effective reproduction number ( $R_t$ )  
9 from compartmental models. A novel input training feature is case projections generated by aligning  
10 estimated effective reproduction number (pre-computed by COVIDActNow.org) with real time testing  
11 data until maximally correlated, helping our model fit better to the epidemic's trajectory as ascertained  
12 by traditional models. Poor reliability of  $R_t$  is partially mitigated with dynamic population mobility  
13 and prevalence and mortality of non-COVID-19 diseases to gauge population disease susceptibility.  
14 The model was used to generate forecasts for 1, 2, 3, and 4 weeks into the future for each reference  
15 week within 11/01/2020 - 01/10/2021 for 3068 counties. Over this time period, it maintained a  
16 mean absolute error (MAE) of less than 300 weekly cases/100,000 and consistently outperformed  
17 or performed comparably with gold-standard compartmental models. Furthermore, it holds great  
18 potential in ensemble modeling due to its potential for a more expansive training feature set while  
19 maintaining good performance and limited resource utilization.

20 **Keywords** COVID-19 · random forest · compartmental model · mobility · US county

## 21 1 Introduction

22 The COVID-19 epidemic in the United States proved devastating economically as it is projected to cause 3.2 to 4.8  
23 trillion USD in net U.S. GDP loss [1]. The epidemic has had a devastating toll on life, particularly among the elderly  
24 and members of ethnic minorities such as African Americans [2]. Throughout the COVID-19 pandemic, it has been  
25 necessary to forecast the progression of the pandemic at the U.S. county/county-equivalent (CCE) level so that local  
26 authorities can effectively implement public health measures such as social distancing or quarantines [3]. This need  
27 is particularly great due to findings that there is low reliability between state-wide and county-specific reported data,  
28 necessitating that the pandemic is tracked at the most granular level possible [4].

29 Forecasts have been traditionally done with compartmental models such as Susceptible-Exposed-Infectious-Recovered  
30 (SEIR) [5, 6]. These models segment the population into various compartments for stages in progression of the disease  
31 of interest. Transitions between these compartments represent epidemic dynamics. These models can be used to solve  
32 for the time-path of the  $R_t$ , which is the estimated ratio of new infections caused by each currently infected individual,  
33 over the course of an epidemic; this in turn can be used to forecast future epidemic progression [6]. However, these  
34 models involve numerous assumptions in their design about disease spread dynamics and their interpretability and  
35 usability is limited by the quality of these assumptions [5, 6, 7].

36 Thus, relatively non-parametric deep or machine-learning models, such as Random Forests (RFs), are attractive  
37 alternatives to compartmental models, as they avoid assumptions about the distribution of input data and generate  
38 forecasts based on observed empirical trends in this data [8, 9]. In addition to being non-parametric, RF-regressors  
39 are highly effective at extracting non-linear relationships from input data while being time efficient [10, 11]. First  
40 described by Breiman, RF-regressors are ensemble models of regression trees each trained on different subsets of  
41 input data, reducing the variance of predictors and minimizing overfitting [12]. In addition, RFs enable relatively easy  
42 estimations of variable importance [13], which can serve as an assessment of model performance. RFs have been  
43 successfully utilized in prior studies for predicting diarrheal infections, Dengue, H5N1 influenza, and West Nile virus  
44 [10, 14, 15, 16, 17]. They also have been applied for short-term forecasting of COVID-19 infections by Ribeiro et al.  
45 [11].

46 We similarly apply an RF to project COVID-19 infections at the more granular CCE level up to 4 weeks in the future  
47 using a unique combination of features including population health and mobility, demographic, and COVID-19 testing  
48 data. Most importantly, a novel feature we develop is preliminary forecasts of cases by taking advantage of our  
49 observation that SEIR-generated  $R_t$  and cases have a similar trajectory over the course of an epidemic but  $R_t$  lags  
50 behind cases, making it predictive of cases in the lag period.

## 51 2 Methods

### 52 2.1 Data Acquisition

53 Our time-series datasets begin on 03/31/2020 for 3068 U.S. CCEs with complete, consistent data that could be processed  
54 without error in our downstream pipelines. To normalize testing and case counts by population, these metrics were  
55 converted to incidence rate (IR) using the 2018 U.S. Census CCE-level population estimates in Eq. 1.

$$IR = \frac{\text{Number of incident cases, tests, etc. during time period}}{\text{County population, state population}} \times 100,000 \quad (1)$$

Table 1: *Raw Training Data Sources and Normalizations.* Description of datasets, variables extracted, regional level, and applied normalization in the training dataset.

| Raw Dataset Source                       | Feature(s)                                                                                | Geographic Level | Transformation Applied               |
|------------------------------------------|-------------------------------------------------------------------------------------------|------------------|--------------------------------------|
| Johns Hopkins University (JHU) CSSE [18] | Weekly case increase                                                                      | CCE-level        | Rolling 7-day sum of case IR (Eq. 1) |
| Facebook.com [19]                        | Daily mobility relative to average baseline, proportion of users staying in same location | CCE-level        | Rolling 7-day mean                   |

Table 1: (continued from previous page)

| Raw Dataset Source                                      | Feature(s)                                                                                                                                                                                                               | Geographic Level          | Transformation Applied                                    |
|---------------------------------------------------------|--------------------------------------------------------------------------------------------------------------------------------------------------------------------------------------------------------------------------|---------------------------|-----------------------------------------------------------|
| COVID Tracking Project [20]                             | Daily tests increase, test positivity                                                                                                                                                                                    | State-level               | Rolling 7-day mean of test IR (Eq. 1) and test positivity |
| COVIDActNow.org [21]                                    | Daily estimated $R_t$                                                                                                                                                                                                    | CCE-level and state-level | None                                                      |
| Institute for Health Metrics and Evaluation (IHME) [22] | Infectious disease mortality rates (tuberculosis, AIDS, diarrheal disease, lower respiratory disease, meningitis, hepatitis)                                                                                             | CCE-level                 | None                                                      |
| IHME [23]                                               | Respiratory disease mortality rates (interstitial lung disease, asthma, coal pneumoconiosis, asbestosis, silicosis, pneumoconiosis, COPD, chronic respiratory disease, other pneumoconiosis, other respiratory diseases) | CCE-level                 | None                                                      |
| IHME [24]                                               | Mortality risk (0-5, 5-25, 25-45, 45-65, and 65-85 age groups), life expectancy                                                                                                                                          | CCE-level                 | None                                                      |
| IHME [25]                                               | Diabetes prevalence rates                                                                                                                                                                                                | CCE-level                 | None                                                      |
| IHME [26]                                               | Obesity prevalence rates (combined male and female)                                                                                                                                                                      | CCE-level                 | None                                                      |
| U.S. Census (2018 estimates) [27]                       | Prevalence of African Americans, Native Americans, Hispanic Americans, Multiracial Americans, and individuals over 65 years of age                                                                                       | CCE-level                 | None                                                      |

## 56 2.2 Generation of $R_t$ and Case Alignment Forecast Features

57 For any given date in every U.S. CCE, we forecasted  $R_t$  and testing-normalized cases for 1, 2, 3, and 4 weeks into the  
 58 future. First, a testing-normalized COVID-19 cases time-series was generated by dividing the “Weekly case increase”  
 59 feature by the “Daily tests increase” feature (see Table 1). The normalized cases time-series and the “Daily estimated  
 60  $R_t$ ” feature were used to generate  $R_t$  and case-prediction features, as shown in Fig. 1. All linear regression models  
 61 were implemented with the *linear\_model.LinearRegression* module [28].

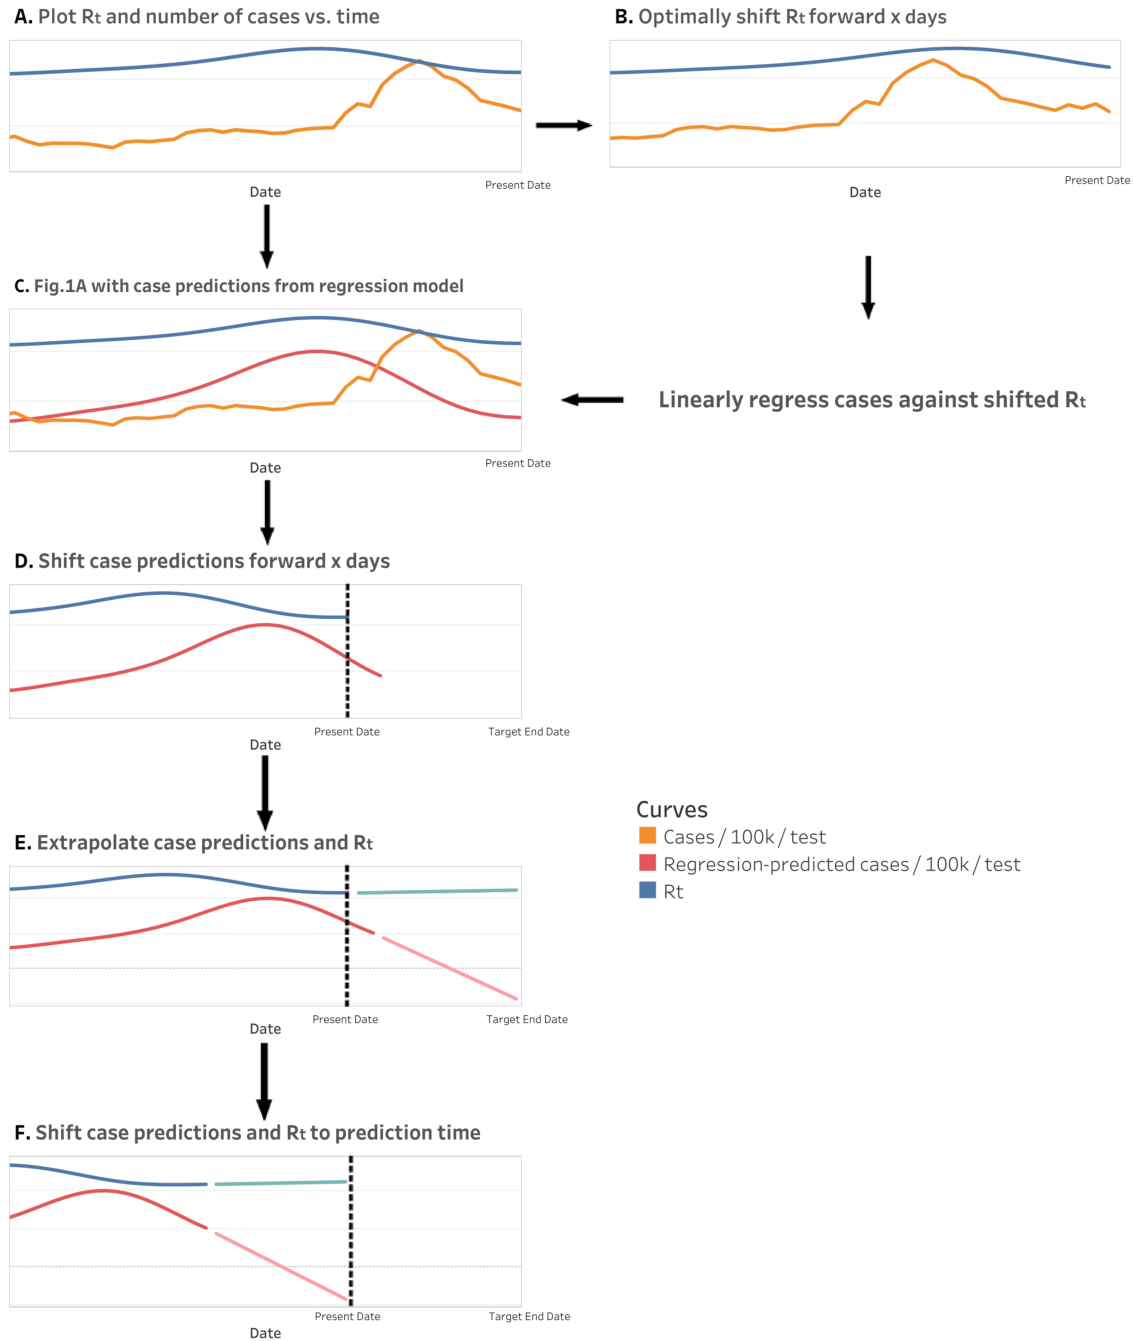

Figure 1:  $R_t$  and case prediction feature generation for a CCE. This procedure is repeated for 7-, 14-, 21- and 28-day forecasts. In Fig. 1A and Fig. 1B,  $R_t$  for the CCE and its state are both separately considered; whichever achieves the highest Pearson correlation of any forward shift  $x$  that is  $<50$  days (i.e. optimal shift) is used for the regression model in Fig. 1B. The extrapolation in Fig. 1E is calculated by linear regression models trained on the last 14 defined values of each curve; curves are extrapolated to the target end date (i.e. 7, 14, 21, or 28 days in the future). For Fig. 1F, curves in prediction time have forecasted values relative to real time; thus, for 28-day forecasts, values are those forecasted 28 days into the future.

## 62 2.3 RF Training and Forecasting

63 The final dataset includes all features in Table 1 for each U.S. CCE; however, "Weekly case increase" and "Daily  
64 estimated  $R_t$ " features are replaced with the Fig. 1F features for 7-, 14-, 21-, and 28-day forecasts. All features are  
65 normalized by removing their mean and scaling to unit variance. Training was performed via incremental learning for  
66 each Sunday from 11/01/2020 to 01/10/2021. For training and validation of the model, we filter out feature data that  
67 occurs on or after the Sunday of interest and randomly split the remaining data with a 9:1 ratio, respectively. A separate  
68 random forest regression model was trained with the training subset for each forecast target (7, 14, 21, or 28 days); the  
69 target outcome was the "Weekly case increase" from Table 1 shifted backwards to appropriately simulate future cases.  
70 Feature data that occurs on the Sunday of interest is used to test the model(i.e. make forecasts), but not to train it.

71 RF regression models are ensemble machine learning algorithms that were first described by Breiman [12]. They create  
72 multiple regression trees trained on unique bootstrap samples of the training dataset with a random subset of the input  
73 features. The output of all trees is averaged to create the final projection. We used the Scikit-learn (version 0.23.2)  
74 implementation with default hyperparameters and 20 estimators [28].

## 76 2.4 Model Evaluation

77 The permutation importance of all features input into the RF models was calculated as described by Breiman as the  
78 decrease in mean squared error of the model when a feature of interest is randomly shuffled [12]. We used two metrics,  
79 MAE and R-squared ( $R^2$ ), to evaluate the accuracy of our model's forecasts relative to actual case counts for both the  
80 training dataset and forecasts outside of the training dataset. These metrics are calculated as follows:

$$R^2 = 1 - \frac{\sum_i (y_i - \hat{y}_i)^2}{\sum_i (y_i - \bar{y}_i)^2} \quad (2)$$

81

$$MAE = \frac{\sum_{i=1}^n |y_i - \hat{y}_i|}{n} \quad (3)$$

82 We also used these metrics to calculate the error for equivalent forecasts by the JHU Infectious Disease Dynamics group  
83 (IDD), the JHU Applied Physics Lab (APL), and One Quiet Night (OQN) forecasting models [29, 30, 31]. These were  
84 selected as they are parts of the U.S. Centers for Disease Control and Prevention (U.S. CDC) ensemble model, have  
85 relatively high performance, and forecast for a large breadth (2349) of U.S. counties along with the RF model [32].

## 86 3 Results and Discussion

### 87 3.1 Analysis of $R_t$ and Case Alignment Forecasts

88 When the case time-series for a CCE was normalized by population and state-level testing data, it often showed a very  
89 similar shape to the CCE and/or state  $R_t$  time-series, as shown in Fig. 1. This should be expected, as both time-series  
90 indicate new infection load over the course of an epidemic, although  $R_t$  lags behind cases, which we suspect is because  
91  $R_t$  represents infection load in the present moment, but these infections will not be detected via testing until much later  
92 due to viral incubation periods of 2-14 days and test result reporting delays [33]. In the 01/10/2021 dataset, the average  
93 optimal shift for the most highly correlated  $R_t$  time-series, whether state or CCE, was 34 days forward.

94

95 However, there were many CCEs where this relationship was weak. We observed that 1782 CCEs' selected, optimally  
96 shifted  $R_t$  time-series have a Pearson correlation with the case time-series  $< 0.5$ . They also have a mean population  
97 density of 89 people/mi<sup>2</sup>, vs. the 273 people/mi<sup>2</sup> mean over the entire set of 3068 CCEs. Thus, we attribute the low  
98 correlations to poor and/or inconsistent testing efforts and data quality in rural CCEs. Further supporting this is our  
99 observation that in CCEs where we select their state's  $R_t$  time-series as opposed to their own, the mean population  
100 density is also relatively low at 210 people/mi<sup>2</sup>.

101 In concurrence with Omori et al., we found that normalization of the case time-series with testing data is critical to  
102 expose underlying changes in COVID-19 progression, as seen in Fig. 2 [34]. However, our approach is limited by use  
103 of state-level testing data as opposed to CCE-level testing data, which was inaccessible to us. However, state-level  
104 testing data has the advantage of including individuals who are not tested in their CCE of residence due to inequity in  
105 regional testing access.

It is made available under a [CC-BY-NC-ND 4.0 International license](https://creativecommons.org/licenses/by-nc-nd/4.0/).

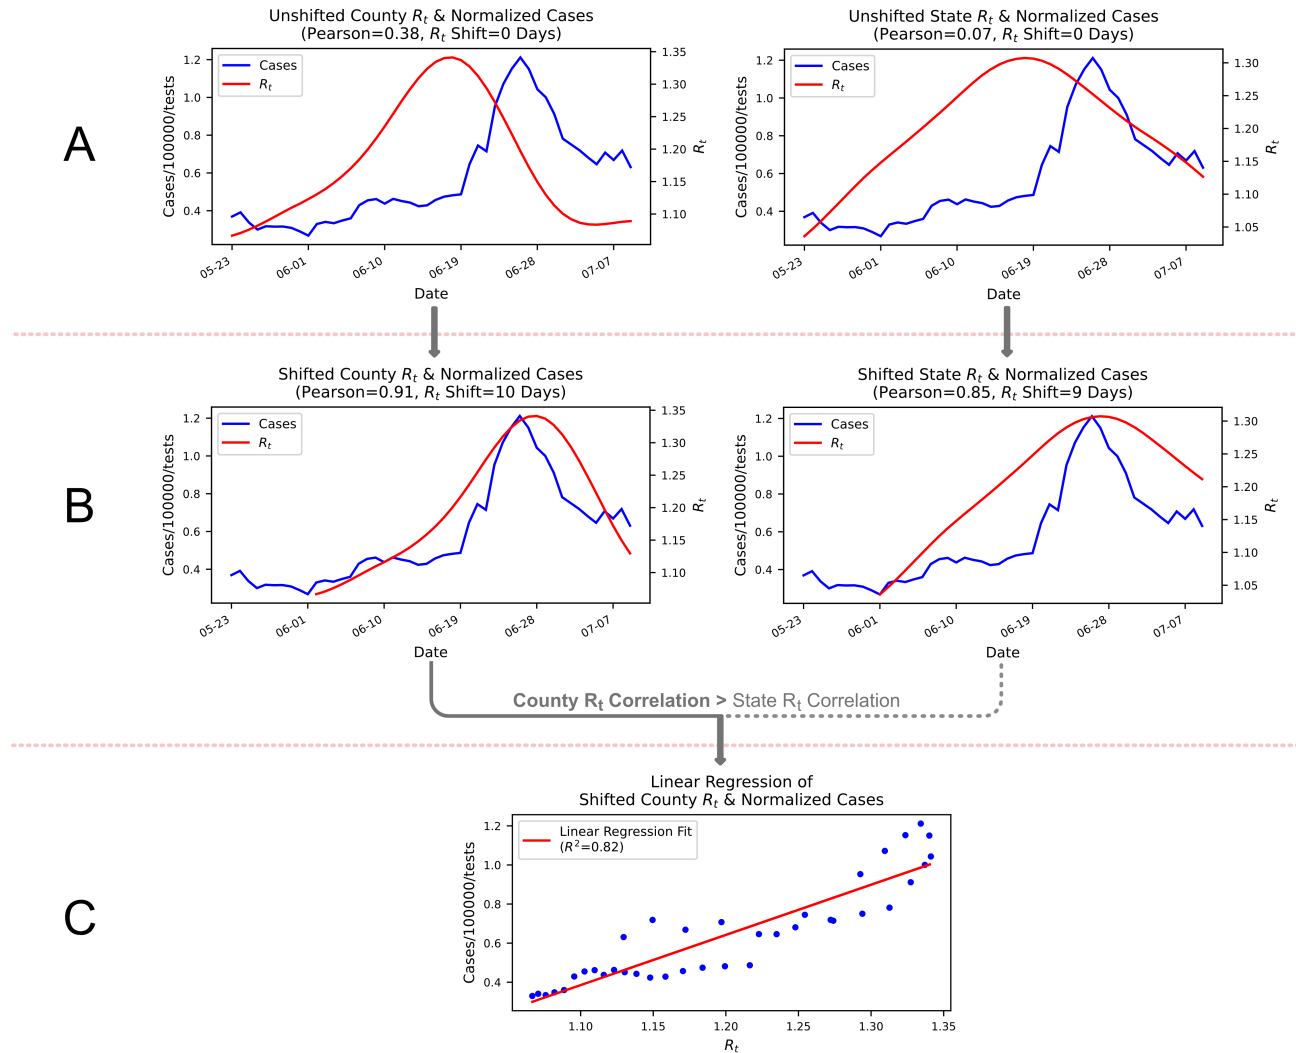

Figure 2:  $R_t$  Time-Series' Lag Behind Case Time-Series Used to Forecast Cases in Lag Period. In Harris County, TX, when the CCE  $R_t$  time-series from 05/22/2020 to 07/10/2020 has a maximum Pearson correlation with the CCE's testing and population normalized case time-series for the same period when shifted forward 10 days (B); also, this correlation is higher than that obtained by any shift of the state  $R_t$  time-series. Thus, the shifted CCE  $R_t$  time-series is linearly regressed against cases (C). This model is applied to unshifted CCE  $R_t$  time-series to generate a case-prediction time-series; the last 10 days of both these time-series are predictive of the next 10 days of cases beyond 07/10/2020.

### 106 3.2 RF Feature Prioritization and Training Performance

107 On average over the 11 epi weeks, RFs always prioritized population-normalized, state-level test numbers, test positivity,  
 108 and case and  $R_t$  alignment forecasts as seen in Fig.3. This validates the model, as these features most directly  
 109 measure COVID-19 progression. Importantly, of all 8 alignment forecasts, those for the desired forecast target were  
 110 always prioritized highest. Conversely, demographic, population health, and population mobility features are relatively  
 111 inconsequential; on average across Fig. 3A-D, these 46 features' share of the total sum of all 56 features' permutation  
 112 scores is just 14.33%.

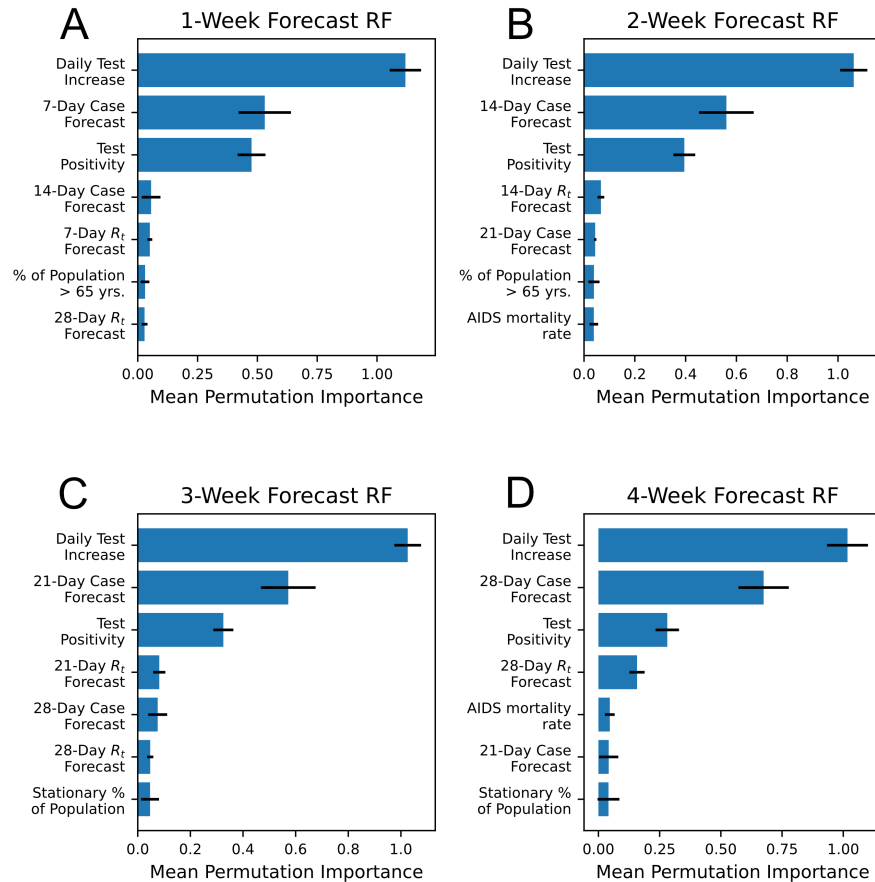

Figure 3: Top 7 RF Features for Each Forecast Target. For each forecast target, RF feature permutation importances were averaged over all 11 epi weeks and the top 7 features are shown in the subfigures above along with their standard deviation as error bars.

113 On the training datasets for all 4 forecast targets and all 11 epi weeks,  $R^2$  was very stable, averaging 0.97 with a  
 114 standard deviation of 0.00. For the corresponding validation datasets,  $R^2$  fell to 0.92 with a standard deviation of  
 115 0.02. Thus, overfitting is not extreme and, considering the RFs' relatively high MAE and  $R^2$  on actual case data in  
 116 comparison to other models as seen in Fig. 4-5, is not detrimental to our objectives.

### 117 3.3 RF Forecasting Performance vs. Other Models

118 As may be observed in Fig. 4 and Fig.5, over the 11 reference weeks for which forecasts were generated by the RF  
 119 models, MAE and  $R^2$  remain relatively consistent compared to the OQN and JHU models. The RF's  $R^2$  is competitive  
 120 with and often higher than the  $R^2$  for other models, notably November 2020. Cases in November were harder to model  
 121 accurately, as November saw a 40% increase in cases in the 3068 counties in its fourth week relative to its first week,  
 122 whereas December only saw an 8% decrease in cases for its equivalent comparison period. Periods of relatively low  
 123 performance are generally shared by all models, indicating that case load changes during these weeks are simply less  
 124 predictable.



It is made available under a [CC-BY-NC-ND 4.0 International license](https://creativecommons.org/licenses/by-nc-nd/4.0/) .

125 For each epi week, case projections from each model were collected and compared to actual cases that occurred during these weeks as reported by JHU [18]. The results were calculated and visualized in Fig. 4-5.

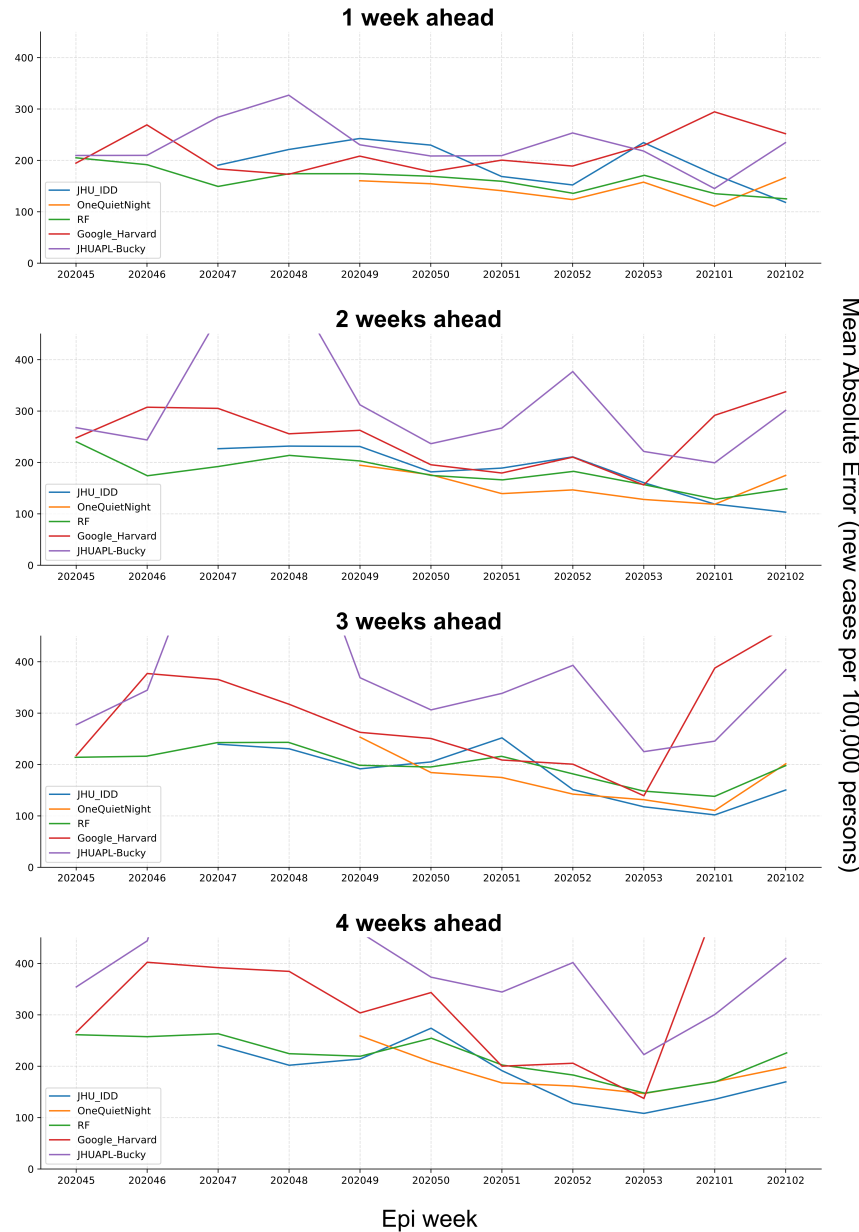

Figure 4: *Performance Evaluation Using MAE*. The errors between projections and real number of incident cases were calculated using Eq. 3. The y-axes of the graphs have been limited so that all models can be visually compared.



It is made available under a [CC-BY-NC-ND 4.0 International license](https://creativecommons.org/licenses/by-nc-nd/4.0/) .

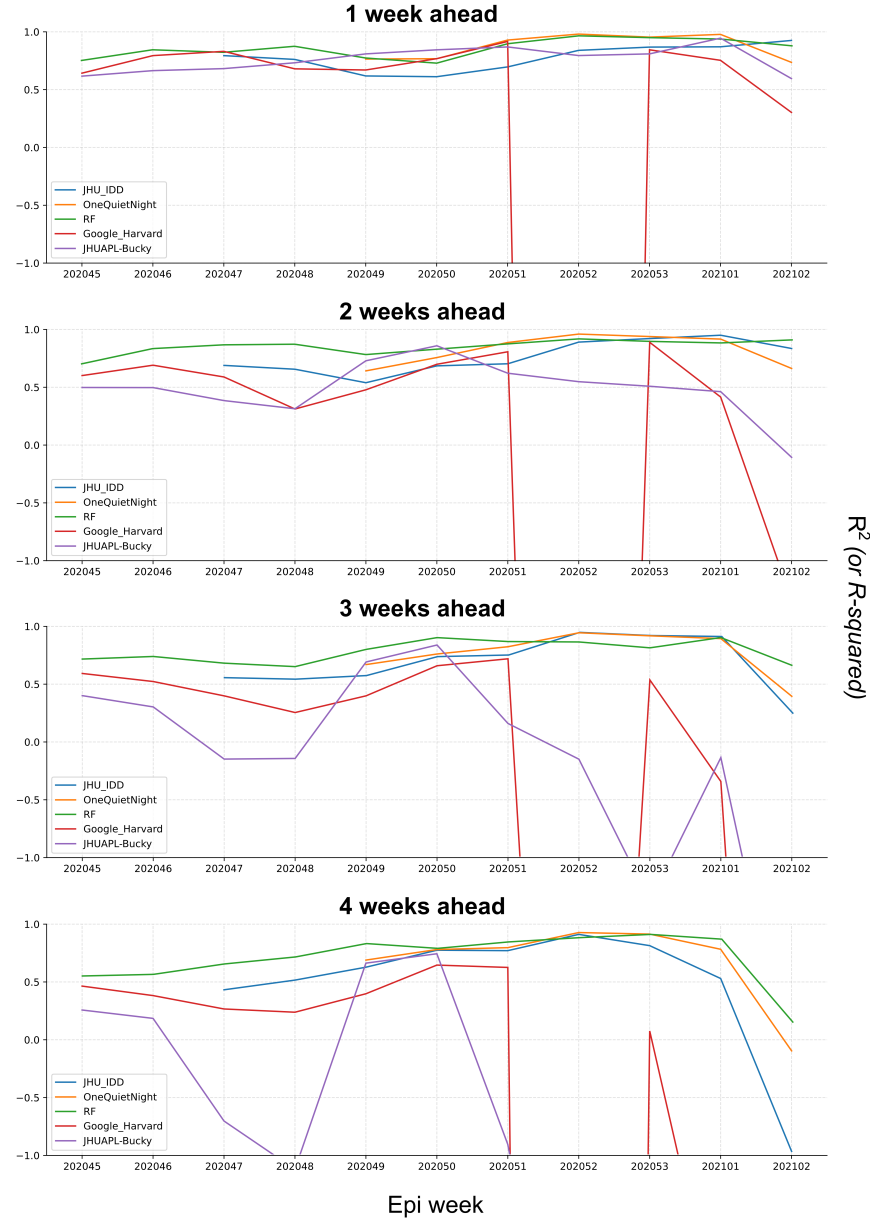

Figure 5: *Performance Evaluation Using  $R^2$* . As with Fig. 4, the y-axes of the graphs have been limited. The proportions of variance between projections and observed values were evaluated using Eq. 2. We notice that there are large anomalies in the weekly  $R^2$  of the Google\_Harvard and JHUAPL\_Bucky models after epi week 202051; however, for the sake of complete comparison, all weeks for all models are shown.

127 The JHU IDD and APL models are SEIR models [29, 30], whereas the OQN model applies a linear regression model to  
 128 each CCE [31]. The distribution of output from a model exclusive to a CCE will be skewed towards the distribution  
 129 of its training dataset labels, which may be a factor explaining OQN's low MAE. On the other hand, the RF model  
 130 forecasts for all counties, affording it a larger dataset which possibly contributes to its relatively high, stable fit to the  
 131 actual cases as indicated by its  $R^2$ .

## 132 4 Conclusion

133 We present a unique method to project COVID-19 cases for CCEs by using their or their state's  $R_t$  time-series to predict  
 134 cases, taking advantage of the backward lag of regional  $R_t$  time-series from the case time-series despite their similar

135 trajectory. These predictions are input into a RF regression models with regional testing, demographic, population  
136 mobility and population health data for final case forecasts. Our approach is computationally inexpensive while  
137 remaining very effective, as our model achieves consistently high  $R^2$  and low MAE relative to gold standard models  
138 used in the U.S. CDC ensemble model during a highly dynamic case spike period in November 2020 – early January  
139 2021. This model is limited to forecasting cases detected by testing as opposed to latent, asymptomatic cases, which can  
140 be estimated by compartmental models [35]. Thus, its best use scenario is for public health officials to identify potential  
141 outbreaks in their community to help them optimize their response. It shows evidence of good consistency in its current  
142 iteration but has some potential for improvement via addition of new features to its training dataset, particularly case  
143 and  $R_t$  forecasts from other compartmental models. Such ensemble forecasting approaches have improved model  
144 performance significantly [36].

## 145 **5 Supplementary Information**

### 146 **5.1 Acknowledgements**

147 We would like to thank Dr. Richard P. Olenick (University of Dallas) for providing us with insightful criticism of the  
148 manuscript. We also wish to thank all organizations that curate our input datasets and make them freely available for  
149 researchers.

### 150 **5.2 Availability of software and other materials**

151 All code and program supporting the conclusions made in this article is publicly available on GitHub. Our repository  
152 can be found at <https://github.com/solveforj/pandemic-central>.

153 Our weekly forecasts are updated and visualized on Pandemic Central, available at <https://itsonit.com>.

### 154 **5.3 Declaration of Competing Interest**

155 We have read and fully understood the competing interest policy. Projections from multiple versions of our model are  
156 voluntarily uploaded to the COVID-19 Forecast Hub since August 2020 and were published by the U.S. CDC [37]. We  
157 wish to declare that:

- 158 • We have no competing interests or external funding.
- 159 • We do not receive any form of support, including financially, from the U.S. CDC or COVID-19 Forecast Hub.
- 160 • We do not have any personal association with organizations in prior 36 months that may have any effect on the  
161 outcome of this research.

## 162 **References**

- 163 [1] T. Walmsley, A. Rose, D. Wei, The impacts of the coronavirus on the economy of the united states, SSRN  
164 Electronic Journal (2020). doi:10.2139/ssrn.3678835.
- 165 [2] C. W. Yancy, COVID-19 and african americans, JAMA 323 (19) (2020) 1891. doi:10.1001/jama.2020.6548.
- 166 [3] A. L. Bertozzi, E. Franco, G. Mohler, M. B. Short, D. Sledge, The challenges of modeling and forecasting  
167 the spread of COVID-19, Proceedings of the National Academy of Sciences 117 (29) (2020) 16732–16738.  
168 doi:10.1073/pnas.2006520117.
- 169 [4] W. Messner, S. Payson, Variation in COVID-19 outbreaks at the US state and county levels, Public Health 187  
170 (2020) 15–18. doi:10.1016/j.puhe.2020.07.035.  
171 URL <https://doi.org/10.1016/j.puhe.2020.07.035>
- 172 [5] H. M. Paiva, R. J. M. Afonso, I. L. de Oliveira, G. F. Garcia, A data-driven model to describe and forecast the  
173 dynamics of COVID-19 transmission, PLOS ONE 15 (7) (2020) e0236386. doi:10.1371/journal.pone.  
174 0236386.
- 175 [6] S. R. Buckman, R. Glick, K. J. Lansing, N. Petrosky-Nadeau, L. M. Seitelman, Replicating and projecting the  
176 path of COVID-19 with a model-implied reproduction number, Infectious Disease Modelling 5 (2020) 635–651.  
177 doi:10.1016/j.idm.2020.08.007.
- 178 [7] Özgür Özmen, J. J. Nutaro, L. L. Pullum, A. Ramanathan, Analyzing the impact of modeling choices and  
179 assumptions in compartmental epidemiological models, SIMULATION 92 (5) (2016) 459–472. doi:10.1177/  
180 0037549716640877.

- 181 [8] A. Zeroual, F. Harrou, A. Dairi, Y. Sun, Deep learning methods for forecasting COVID-19 time-series data: A  
182 comparative study, *Chaos, Solitons & Fractals* 140 (2020) 110121. doi:10.1016/j.chaos.2020.110121.
- 183 [9] A. C. Shang, , K. E. Galow, G. G. Galow, and, Regional forecasting of COVID-19 caseload by non-  
184 parametric regression: a VAR epidemiological model, *AIMS Public Health* 8 (1) (2021) 124–136. doi:  
185 10.3934/publichealth.2021010.
- 186 [10] X. Fang, W. Liu, J. Ai, M. He, Y. Wu, Y. Shi, W. Shen, C. Bao, Forecasting incidence of infectious diarrhea  
187 using random forest in jiangsu province, china, *BMC Infectious Diseases* 20 (1) (Mar 2020). doi:10.1186/  
188 s12879-020-4930-2.
- 189 [11] M. H. D. M. Ribeiro, R. G. da Silva, V. C. Mariani, L. dos Santos Coelho, Short-term forecasting COVID-19  
190 cumulative confirmed cases: Perspectives for brazil, *Chaos, Solitons & Fractals* 135 (2020) 109853. doi:  
191 10.1016/j.chaos.2020.109853.
- 192 [12] L. Breiman, Random forests, *Machine Learning* 45 (1) (2001) 5–32. doi:10.1023/A:1010933404324.
- 193 [13] X. Chen, H. Ishwaran, Random forests for genomic data analysis, *Genomics* 99 (6) (2012) 323–329. doi:  
194 10.1016/j.ygeno.2012.04.003.
- 195 [14] G. Machado, M. R. Mendoza, L. G. Corbellini, What variables are important in predicting bovine viral diarrhea  
196 virus? a random forest approach, *Veterinary Research* 46 (1) (Jul 2015). doi:10.1186/s13567-015-0219-7.
- 197 [15] E. Mussumeci, F. C. Coelho, Large-scale multivariate forecasting models for dengue - LSTM versus random forest  
198 regression, *Spatial and Spatio-temporal Epidemiology* 35 (2020) 100372. doi:10.1016/j.sste.2020.100372.
- 199 [16] M. J. Kane, N. Price, M. Scotch, P. Rabinowitz, Comparison of ARIMA and random forest time series models  
200 for prediction of avian influenza h5n1 outbreaks, *BMC Bioinformatics* 15 (1) (Aug 2014). doi:10.1186/  
201 1471-2105-15-276.
- 202 [17] A. C. Keyel, O. E. Timm, P. B. Backenson, C. Prussing, S. Quinones, K. A. McDonough, M. Vuille, J. E. Conn,  
203 P. M. Armstrong, T. G. Andreadis, L. D. Kramer, Seasonal temperatures and hydrological conditions improve  
204 the prediction of west nile virus infection rates in culex mosquitoes and human case counts in new york and  
205 connecticut, *PLOS ONE* 14 (6) (2019) e0217854. doi:10.1371/journal.pone.0217854.
- 206 [18] COVID-19 map, Available: <https://coronavirus.jhu.edu/map.html>.
- 207 [19] Movement range maps, Available: <https://data.humdata.org/dataset/movement-range-maps>.
- 208 [20] The COVID tracking project, Available: <https://covidtracking.com>.
- 209 [21] COVID Act Now, Available: <https://covidactnow.org/data-api>.
- 210 [22] United states infectious disease mortality rates by county 1980-2014, Available: <http://ghdx.healthdata.org/record/ihme-data/united-states-infectious-disease-mortality-rates-county-1980-2014>.
- 211 [23] United states chronic respiratory disease mortality rates by county 1980-  
212 2014, Available: [http://ghdx.healthdata.org/record/ihme-data/](http://ghdx.healthdata.org/record/ihme-data/united-states-chronic-respiratory-disease-mortality-rates-county-1980-2014)  
213 [united-states-chronic-respiratory-disease-mortality-rates-county-1980-2014](http://ghdx.healthdata.org/record/ihme-data/united-states-chronic-respiratory-disease-mortality-rates-county-1980-2014).
- 214 [24] United states life expectancy and age-specific mortality risk by county  
215 1980-2014, Available: [http://ghdx.healthdata.org/record/ihme-data/](http://ghdx.healthdata.org/record/ihme-data/united-states-life-expectancy-and-age-specific-mortality-risk-county-1980-2014)  
216 [united-states-life-expectancy-and-age-specific-mortality-risk-county-1980-2014](http://ghdx.healthdata.org/record/ihme-data/united-states-life-expectancy-and-age-specific-mortality-risk-county-1980-2014).
- 217 [25] United states diabetes prevalence by county 1999-2012, Available: [http://ghdx.healthdata.org/record/](http://ghdx.healthdata.org/record/ihme-data/united-states-diabetes-prevalence-county-1999-2012)  
218 [ihme-data/united-states-diabetes-prevalence-county-1999-2012](http://ghdx.healthdata.org/record/ihme-data/united-states-diabetes-prevalence-county-1999-2012).
- 219 [26] United states physical activity and obesity prevalence by county 2001-2011, Available: [https://doi.org/10.](https://doi.org/10.6069/5E84-HD26)  
220 [6069/5E84-HD26](https://doi.org/10.6069/5E84-HD26).
- 221 [27] County population by characteristics, Available: [https://www.census.gov/data/datasets/time-series/](https://www.census.gov/data/datasets/time-series/demo/popest/2010s-counties-detail.html)  
222 [demo/popest/2010s-counties-detail.html](https://www.census.gov/data/datasets/time-series/demo/popest/2010s-counties-detail.html).
- 223 [28] F. Pedregosa, G. Varoquaux, A. Gramfort, V. Michel, B. Thirion, O. Grisel, M. Blondel, P. Prettenhofer, R. Weiss,  
224 V. Dubourg, J. Vanderplas, A. Passos, D. Cournapeau, M. Brucher, M. Perrot, E. Duchesnay, Scikit-learn: Machine  
225 learning in python, *Journal of Machine Learning Research* 12 (85) (Oct 2011).  
226 URL <https://jmlr.org/papers/volume12/pedregosa11a/pedregosa11a.pdf>
- 227 [29] J. C. Lemaitre, K. H. Grantz, J. Kaminsky, H. R. Meredith, S. A. Truelove, S. A. Lauer, L. T. Keegan, S. Shah,  
228 J. Wills, K. Kaminsky, J. Perez-Saez, J. Lessler, E. C. Lee, A scenario modeling pipeline for covid-19 emergency  
229 planning, *Scientific Reports* 11 (1) (2021) 7534. doi:10.1038/s41598-021-86811-0.
- 230 [30] The Johns Hopkins University Applied Physics Laboratory, Bucky's documentation, unpublished (2020).  
231 URL <https://docs.buckymodel.com/en/latest/index.html>
- 232

- 233 [31] A. Jo, J. Cho, OneQuietNight COVID-19 forecast, unpublished manuscript (2021).  
234 URL <https://one-quiet-night.github.io/vis/static/media/0QN.631fe207.pdf>
- 235 [32] E. L. Ray, N. Wattanachit, J. Niemi, A. H. Kanji, K. House, E. Y. Cramer, J. Bracher, A. Zheng, T. K. Yamana,  
236 X. Xiong, S. Woody, Y. Wang, L. Wang, R. L. Walraven, V. Tomar, K. Sherratt, D. Sheldon, R. C. Reiner, B. A.  
237 Prakash, D. Osthus, M. L. Li, E. C. Lee, U. Koyluoglu, P. Keskinocak, Y. Gu, Q. Gu, G. E. George, G. España,  
238 S. Corsetti, J. Chhatwal, S. Cavany, H. Biegel, M. Ben-Nun, J. Walker, R. Slayton, V. Lopez, M. Biggerstaff, M. A.  
239 Johansson, N. G. Reich, Ensemble forecasts of coronavirus disease 2019 (COVID-19) in the u.s., unpublished  
240 manuscript (2020). doi:10.1101/2020.08.19.20177493.  
241 URL <https://www.medrxiv.org/content/early/2020/08/22/2020.08.19.20177493>
- 242 [33] Clinical questions about COVID-19: Questions and answers, Available: [https://www.cdc.gov/coronavirus/](https://www.cdc.gov/coronavirus/2019-ncov/hcp/faq.html)  
243 [2019-ncov/hcp/faq.html](https://www.cdc.gov/coronavirus/2019-ncov/hcp/faq.html).
- 244 [34] R. Omori, K. Mizumoto, G. Chowell, Changes in testing rates could mask the novel coronavirus disease (COVID-  
245 19) growth rate, *International Journal of Infectious Diseases* 94 (2020) 116–118. doi:10.1016/j.ijid.2020.  
246 04.021.
- 247 [35] A. Rădulescu, C. Williams, K. Cavanagh, Management strategies in a SEIR-type model of COVID 19 community  
248 spread, *Scientific Reports* 10 (1) (dec 2020). doi:10.1038/s41598-020-77628-4.
- 249 [36] N. E. Dean, A. P. y Piontti, Z. J. Madewell, D. A. Cummings, M. D. Hitchings, K. Joshi, R. Kahn, A. Vespignani,  
250 M. E. Halloran, I. M. Longini, Ensemble forecast modeling for the design of COVID-19 vaccine efficacy trials,  
251 *Vaccine* 38 (46) (2020) 7213–7216. doi:10.1016/j.vaccine.2020.09.031.
- 252 [37] COVID-19 forecast hub, Available: <https://github.com/reichlab/covid19-forecast-hub>.
